# Supplementary material for: Evaluation of Crohn’s Disease Small-Bowel Mucosal Healing Using Capsule Endoscopy and Usefulness of Leucine-Rich α2-Glycoprotein
Source: MDPI journal article supplement (doi:10.3390/diagnostics13040626), 2023-02-08
Supplement: s1 [file s1]

Table S1. Patient Characteristics

| Sex | Age<br>(years) | Disease<br>location | CDAI | Alb<br>(g/dL) | CRP<br>(mg/dL) | LRG<br>(µg/mL) | Medication<br>history | CE activity<br>scores |        | Achievement of MH |        |
|-----|----------------|---------------------|------|---------------|----------------|----------------|-----------------------|-----------------------|--------|-------------------|--------|
|     |                |                     |      |               |                |                |                       | LS                    | CECDAI | CS-MH             | CE-MH  |
| M   | 14             | I                   | 95   | 4.5           | 0.02           | 8.5            | 5ASA ED<br>ADA        | 0                     | 0      | (-)               | MH     |
| M   | 42             | I                   | 70   | 4.4           | 0.11           | 14.2           | 5ASA                  | 1036                  | 8      | (-)               | Non-MH |
| M   | 37             | I                   | 38   | 3.8           | 0.33           | 12.4           | 5ASA                  | 0                     | 0      | MH                | MH     |
| F   | 34             | IC                  | 327  | 3.6           | 0.11           | 15.2           | 5ASA 6MP<br>UST       | 562                   | 12     | MH                | Non-MH |
| F   | 39             | IC                  | 208  | 4.2           | 0.03           | 16.1           | ED UST                | 233                   | 6      | MH                | Non-MH |
| M   | 21             | IC                  | 155  | 4.2           | 1.33           | 18.5           | (-)                   | 2938                  | 18     | Non-MH            | Non-MH |
| M   | 46             | IC                  | 125  | 3.7           | 0.07           | 19.3           | 5ASA ED<br>UST        | 458                   | 14     | Non-MH            | Non-MH |
| M   | 33             | IC                  | 107  | 3.6           | 0.20           | 22.2           | 5ASA ED<br>ADA        | 1036                  | 14     | Non-MH            | Non-MH |
| M   | 21             | IC                  | 100  | 4.6           | 0.1            | 13.8           | 5ASA ED               | 233                   | 12     | (-)               | Non-MH |
| M   | 25             | IC                  | 74   | 4.8           | 0.13           | 9.9            | 5ASA ED<br>IFX        | 782                   | 13     | Non-MH            | Non-MH |
| M   | 20             | IC                  | 65   | 5.1           | 0.11           | 11.7           | 5ASA ED<br>AZP IFX    | 3789                  | 8      | (-)               | Non-MH |
| F   | 49             | IC                  | 56   | 4.6           | 0.03           | 9.7            | 5ASA AZP<br>ADA       | 0                     | 3      | MH                | MH     |
| M   | 48             | IC                  | 43   | 4.5           | 0.14           | 14.4           | ED AZP<br>IFX         | 233                   | 3      | Non-MH            | Non-MH |

|   |    |    |     |     |      |      |                    |     |   |        |        |
|---|----|----|-----|-----|------|------|--------------------|-----|---|--------|--------|
| F | 22 | IC | 34  | 4.5 | 0.03 | 8.8  | 5ASA AZP<br>IFX    | 0   | 0 | (-)    | MH     |
| F | 33 | IC | 30  | 4.4 | 0.03 | 9.6  | 5ASA IFX           | 0   | 0 | (-)    | MH     |
| F | 25 | IC | 27  | 3.8 | 0.04 | 9.4  | ED AZP<br>IFX      | 0   | 0 | (-)    | MH     |
| M | 41 | IC | 20  | 5.1 | 0.02 | 11.6 | 5ASA ED<br>AZP IFX | 0   | 0 | (-)    | MH     |
| M | 45 | IC | 20  | 4.6 | 0.2  | 11.9 | 5ASA AZP           | 135 | 3 | (-)    | Non-MH |
| F | 29 | C  | 260 | 3.8 | 0.04 | 19.5 | 5ASA ED            | 0   | 0 | Non-MH | MH     |
| F | 35 | C  | 89  | 4.3 | 0.02 | 9.7  | (-)                | 0   | 0 | Non-MH | MH     |

I: Ileal type, IC: colonic type, C: colonic type, CDAI: Crohn's disease activity index, Alb: blood albumin level, CRP: C-reactive protein, LRG: Leucine-Rich Alpha-2 glycoprotein, 5ASA: 5-aminosalicylic acid, ED: elemental diet, 6MP: 6-mercaptopurine, AZP: azathioprine, IFX: infliximab, ADA: adalimumab, UST: ustekinumab, LS: Lewis score, CECDAI: capsule endoscopy Crohn's disease activity index, CS: ileocolonoscopy, MH: mucosal healing, CE: capsule endoscopy. "CS-MH" means the group that achieved MH within the CS observation range (terminal ileum-rectum). "CE-MH" means the group that achieved MH in both LS <135 and CECDAI <3.5.
